# Supplementary material
Source: PubMed Central journal article supplement (PMC3499327)
Supplement: epi-7-1258-s01.pdf [file epi-7-1258-s01.pdf]

## **Supplemental Material to:**

**Susan R. Sturgeon, Raji Balasubramanian, Catherine Schairer, Hyman B. Muss, Regina G. Ziegler and Kathleen F. Arcaro**

**Detection of promoter methylation of tumor suppressor genes in serum DNA of breast cancer cases and benign breast disease controls**

**Epigenetics 2012; 7(11)**

**<http://dx.doi.org/10.4161/epi.22220>**

**<http://www.landesbioscience.com/journals/epigenetics/article/22220>**

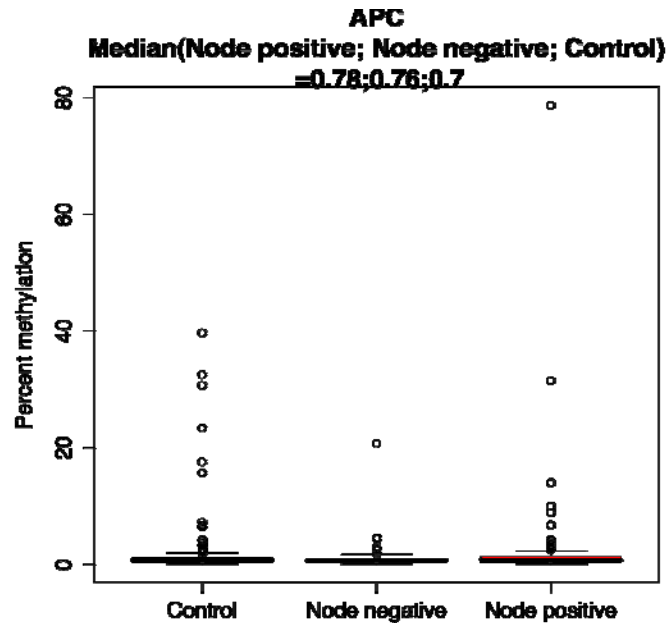

Figure 1: Distribution of mean percent methylation levels of APC among the node positive, node negative and control subjects.

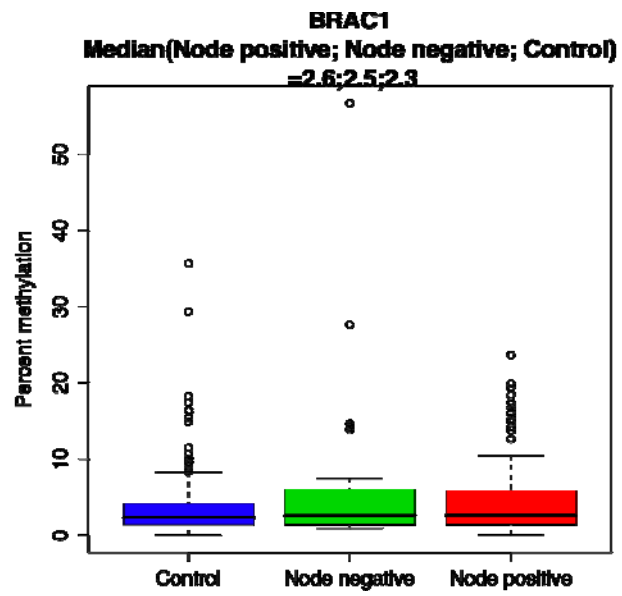

Figure 2: Distribution of mean percent methylation levels of BRAC1 among the node positive, node negative and control subjects.

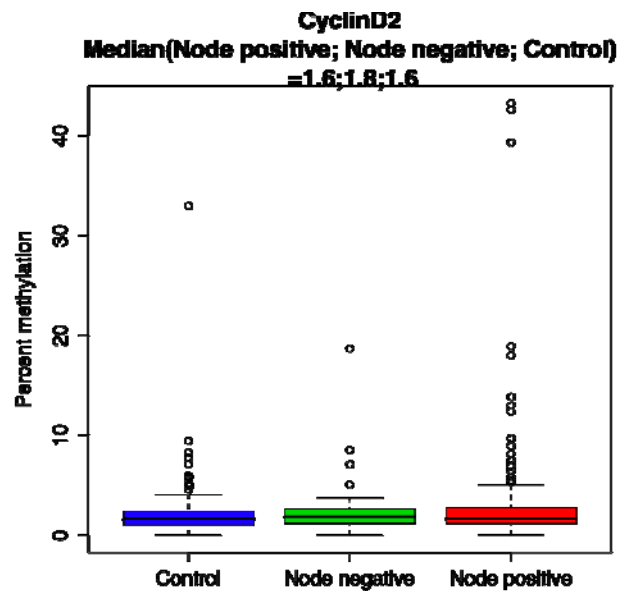

Figure 3: Distribution of mean percent methylation levels of Cyclin D2 among the node positive, node negative and control subjects.

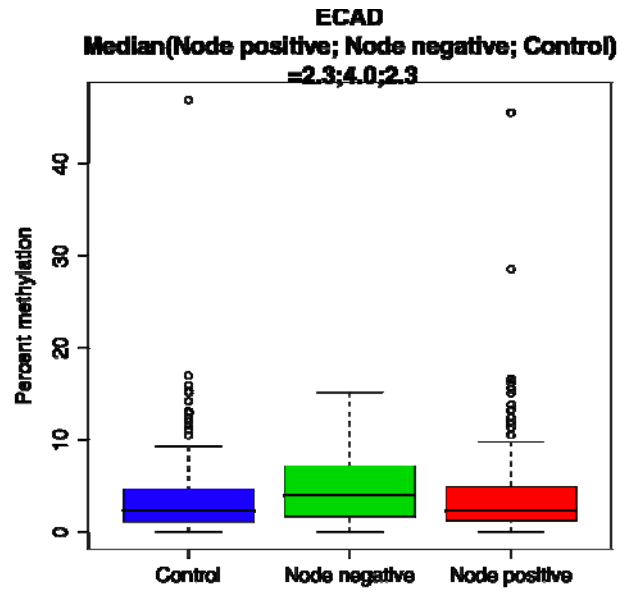

Figure 4: Distribution of mean percent methylation levels of ECAD among the node positive, node negative and control subjects.

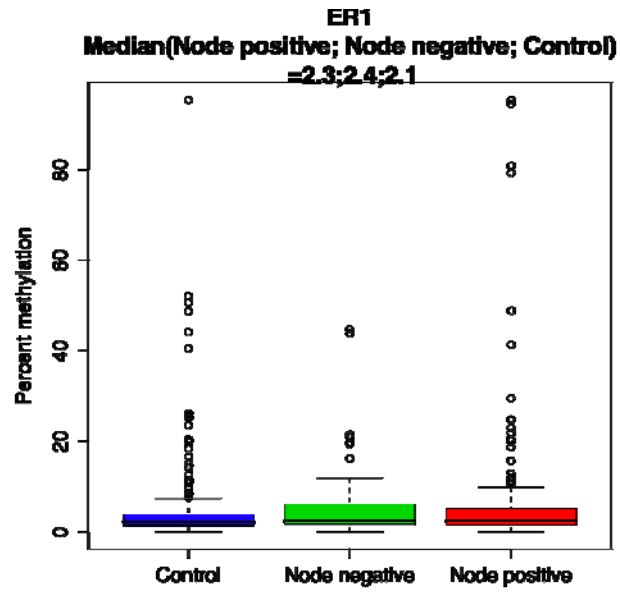

Figure 5: Distribution of mean percent methylation levels of ER1 among the node positive, node negative and control subjects.

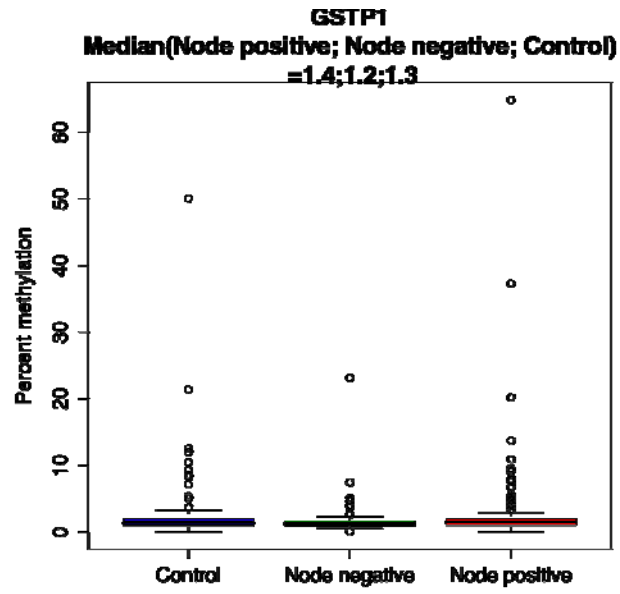

Figure 6: Distribution of mean percent methylation levels of GSTP1 among the node positive, node negative and control subjects.

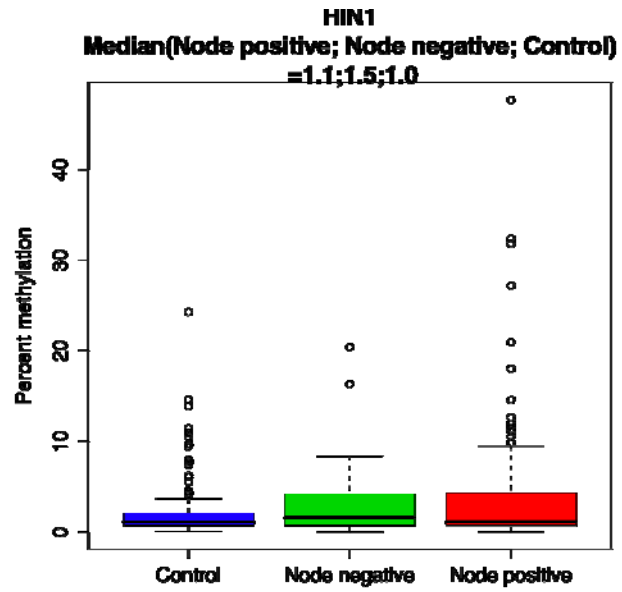

Figure 7: Distribution of mean percent methylation levels of HIN1 among the node positive, node negative and control subjects.



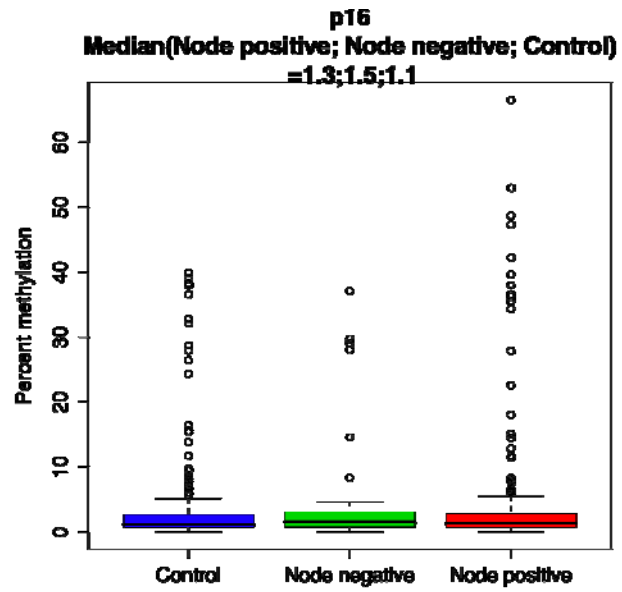

Figure 8: Distribution of mean percent methylation levels of p16 among the node positive, node negative and control subjects.

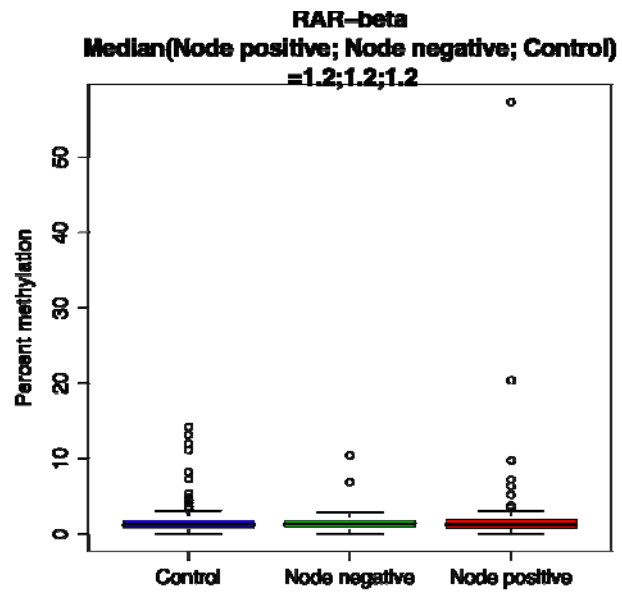

Figure 9: Distribution of mean percent methylation levels of RAR- $\beta$  among the node positive, node negative and control subjects.

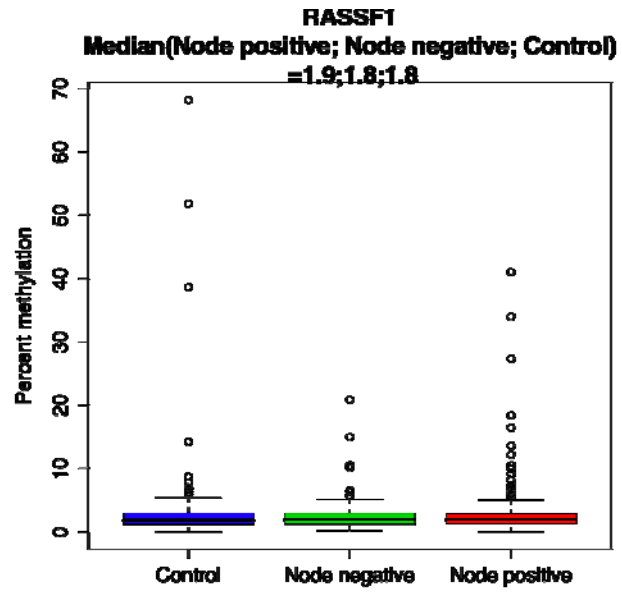

Figure 10: Distribution of mean percent methylation levels of RASSF1 among the node positive, node negative and control subjects.

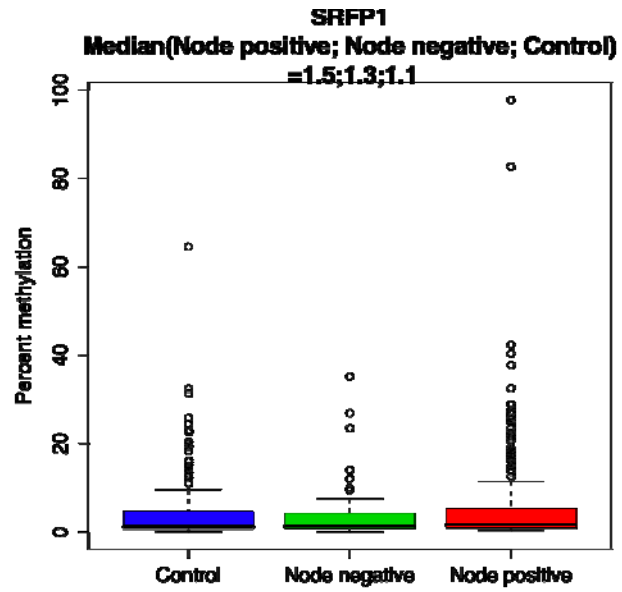

Figure 11: Distribution of mean percent methylation levels of SRFP1 among the node positive, node negative and control subjects.

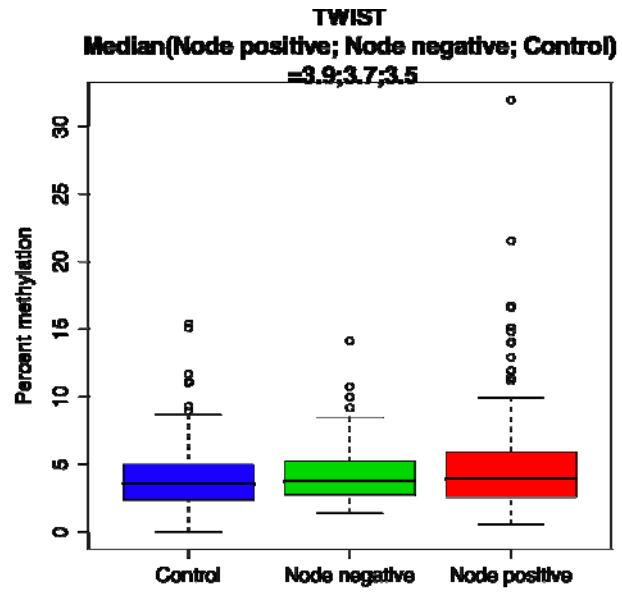

Figure 12: Distribution of mean percent methylation levels of TWIST among the node positive, node negative and control subjects.
